# Supplementary material for: Driver Attribute Filling for Genes in Interaction Network via Modularity Subspace-Based Concept Learning from Small Samples
Source: Hindawi journal article supplement (doi:10.1155/2020/6643551), 2020-11-23
Supplement: f1 [file 6643551.f1.pdf]

Table S1: Predicted gene lists of our proposed model on STRING network and iRefIndex network for data of prostate cancer samples and thyroid cancer samples.

|    | STRING network<br>(prostate cancer) | STRING network<br>(thyroid cancer) | iRefIndex network<br>(prostate cancer) | iRefIndex network<br>(thyroid cancer) |
|----|-------------------------------------|------------------------------------|----------------------------------------|---------------------------------------|
| 1  | AR                                  | AKAP9                              | AR                                     | AKAP9                                 |
| 2  | BRAF                                | BRAF                               | BRAF                                   | BRAF                                  |
| 3  | CANT1                               | CCDC6                              | CANT1                                  | CCDC6                                 |
| 4  | DDX5                                | ERC1                               | DDX5                                   | ERC1                                  |
| 5  | ERG                                 | GOLGA5                             | ERG                                    | GOLGA5                                |
| 6  | ETV1                                | HOOK3                              | ETV1                                   | HOOK3                                 |
| 7  | ETV4                                | KRAS                               | ETV4                                   | KRAS                                  |
| 8  | FOXA1                               | NRAS                               | FOXA1                                  | KTN1                                  |
| 9  | HERPUD1                             | PCM1                               | HERPUD1                                | NRAS                                  |
| 10 | KLF6                                | PPARG                              | KLF6                                   | PCM1                                  |
| 11 | KLK2                                | RET                                | KLK2                                   | PPARG                                 |
| 12 | NDRG1                               | TSHR                               | PTEN                                   | RET                                   |
| 13 | PTEN                                | A1BG                               | SPOP                                   | TPM3                                  |
| 14 | SPOP                                | A1CF                               | ZFH3                                   | TSHR                                  |
| 15 | TMPRSS2                             | A2LD1                              | A1BG                                   | A1BG                                  |
| 16 | ZFH3                                | A2M                                | A1CF                                   | A1CF                                  |
| 17 | A1BG                                | A4GALT                             | A2M                                    | A2M                                   |
| 18 | A1CF                                | AAAS                               | AAAS                                   | AAAS                                  |
| 19 | A2LD1                               | AACS                               | AADAT                                  | AADAT                                 |
| 20 | A2M                                 | AADAC                              | AAGAB                                  | AAGAB                                 |

Table S2: Functional enrichment analysis results of our proposed model on iRefIndex network. (a) Enrichment results of prostate cancer. (b) Enrichment results of thyroid cancer.

| a  | Function term                                                                                                             | p-value  |
|----|---------------------------------------------------------------------------------------------------------------------------|----------|
| 1  | GO:0033148: positive regulation of intracellular estrogen receptor signaling pathway                                      | 5.43E-05 |
| 2  | GO:0019899: enzyme binding                                                                                                | 2.89E-04 |
| 3  | GO:0043565: sequence-specific DNA binding                                                                                 | 1.52E-03 |
| 4  | GO:0001077: transcriptional activator activity, RNA polymerase II core promoter proximal region sequence-specific binding | 1.59E-03 |
| 5  | GO:0003700: transcription factor activity, sequence-specific DNA binding                                                  | 2.06E-03 |
| 6  | hsa05202:Transcriptional misregulation in cancer                                                                          | 3.36E-03 |
| 7  | GO:0005654: nucleoplasm                                                                                                   | 4.56E-03 |
| 8  | GO:0060740: prostate gland epithelium morphogenesis                                                                       | 7.90E-03 |
| 9  | GO:0060736: prostate gland growth                                                                                         | 9.02E-03 |
| 10 | GO:0005634: nucleus                                                                                                       | 9.72E-03 |

| b  | Function term                       | p-value  |
|----|-------------------------------------|----------|
| 1  | hsa05216:Thyroid cancer             | 1.47E-12 |
| 2  | hsa05200:Pathways in cancer         | 1.21E-05 |
| 3  | GO:0000165: MAPK cascade            | 1.87E-04 |
| 4  | GO:0005801: cis-Golgi network       | 8.65E-04 |
| 5  | GO:0015031: protein transport       | 8.83E-04 |
| 6  | hsa05219:Bladder cancer             | 1.84E-03 |
| 7  | hsa05213:Endometrial cancer         | 2.95E-03 |
| 8  | hsa05221:Acute myeloid leukemia     | 3.42E-03 |
| 9  | hsa05223:Non-small cell lung cancer | 3.42E-03 |
| 10 | hsa04730:Long-term depression       | 3.91E-03 |

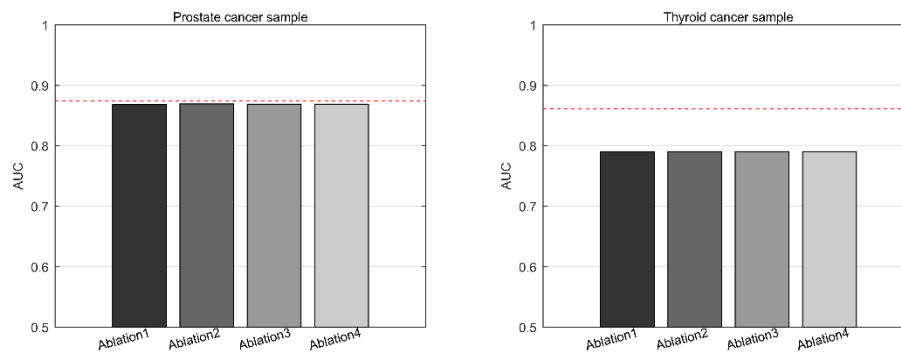

Figure S1: Ablation study on modules in our model for STRING network. The red dash lines represent the AUCs for cases of all modules, and the four bars denote the AUCs for cases of random ablation of three fourths of modules. (a) Prostate cancer samples; (b) Thyroid cancer samples.

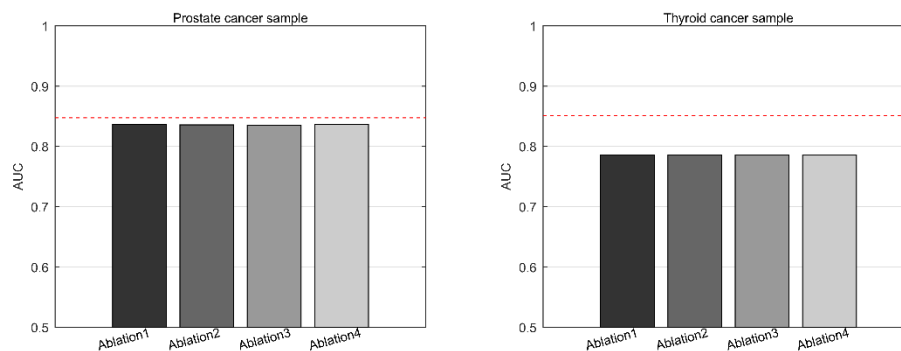

Figure S2: Ablation study on modules in our model for iRefIndex network. The red dash lines represent the AUCs for cases of all modules, and the four bars denote the AUCs for cases of random ablation of three fourths of modules. (a) Prostate cancer samples; (b) Thyroid cancer samples.

## Supplementary Text:

### Hyperparameter settings

In the selection of hyperparameters, there are totally three hyperparameter in our model, i.e.  $\lambda_X$ ,  $\lambda_H$ , and  $\lambda_\epsilon$ . When the degree of freedom of hyperparameters is large, the hyperparameters selection is much more difficult through grid search. Here we incorporate the design that matrix  $\mathbf{H}_\epsilon$  is served as residual in the fusion of the two types of features  $\mathbf{H}$  and  $\tilde{\mathbf{H}}$ . Considering that the scale of residuals is much smaller than that of the primary matrix, we enforce the value of hyperparameter  $\lambda_\epsilon$  being 2~3 magnitude greater than that of hyperparameter  $\lambda_H$ . This setting can ensure the scale dominant of matrix  $\mathbf{H}$  in comparison of residual matrix  $\mathbf{H}_\epsilon$ . Based on the consideration above, there are only two free hyperparameter  $\lambda_X$  and  $\lambda_H$ , which are then determined by grid search strategy.
